# Supplementary material
Source: Springer Nature journal article supplement (https://www.springermedizin.de/resource/supplementary/12936_2012_2607_MOESM2_ESM.pdf/9543306)

*An. arabiensis*

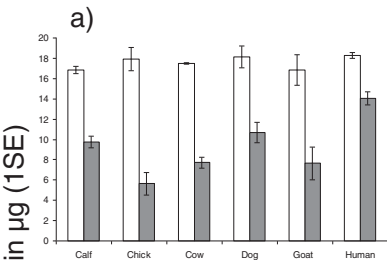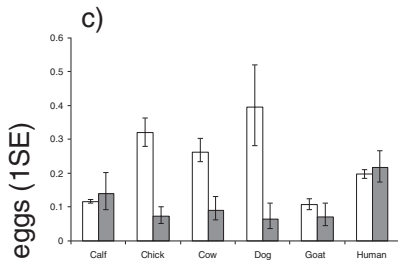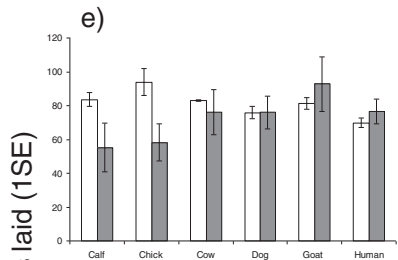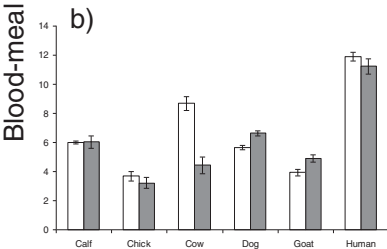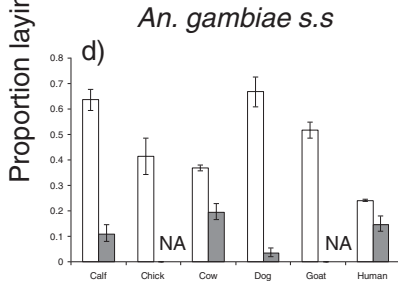

*An. gambiae s.s.*

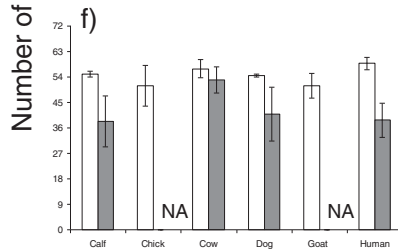

Supplement: MOESM2 [file 9543306]
